# Supplementary material for: Predicting Abiotic Soil Characteristics Using Sentinel-2 at Nature-Management-Relevant Spatial Scales and Extent
Source: Preprints.org preprint supplement (doi:10.20944/preprints202405.1905.v1), 2024-05-29
Supplement: Supplementary file 1 [file supplementary]

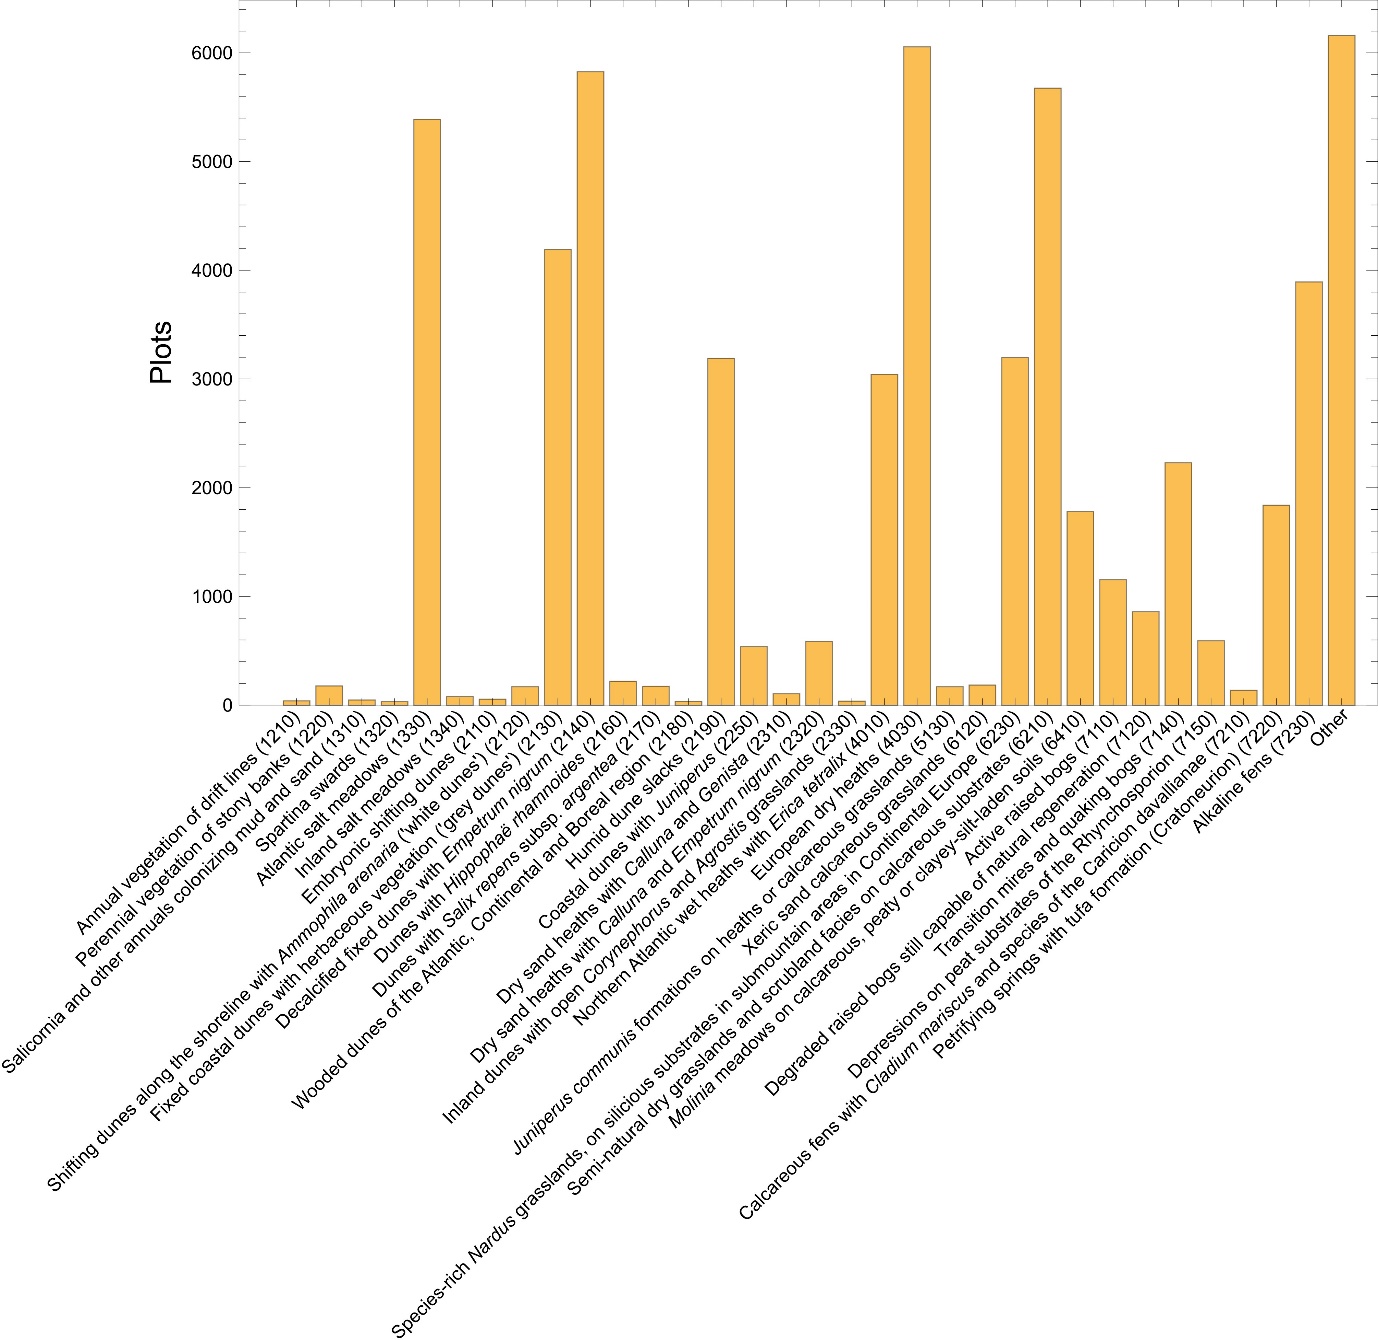


**Figure S1.** Histogram showing how many plots that belong to each habitat type. For each habitat type the corresponding code from the Habitats Directive’s Annex I [1] is given in parentheses. The category “other” covers habitat types that did not conform to the exact habitat definitions but were close to these definitions.


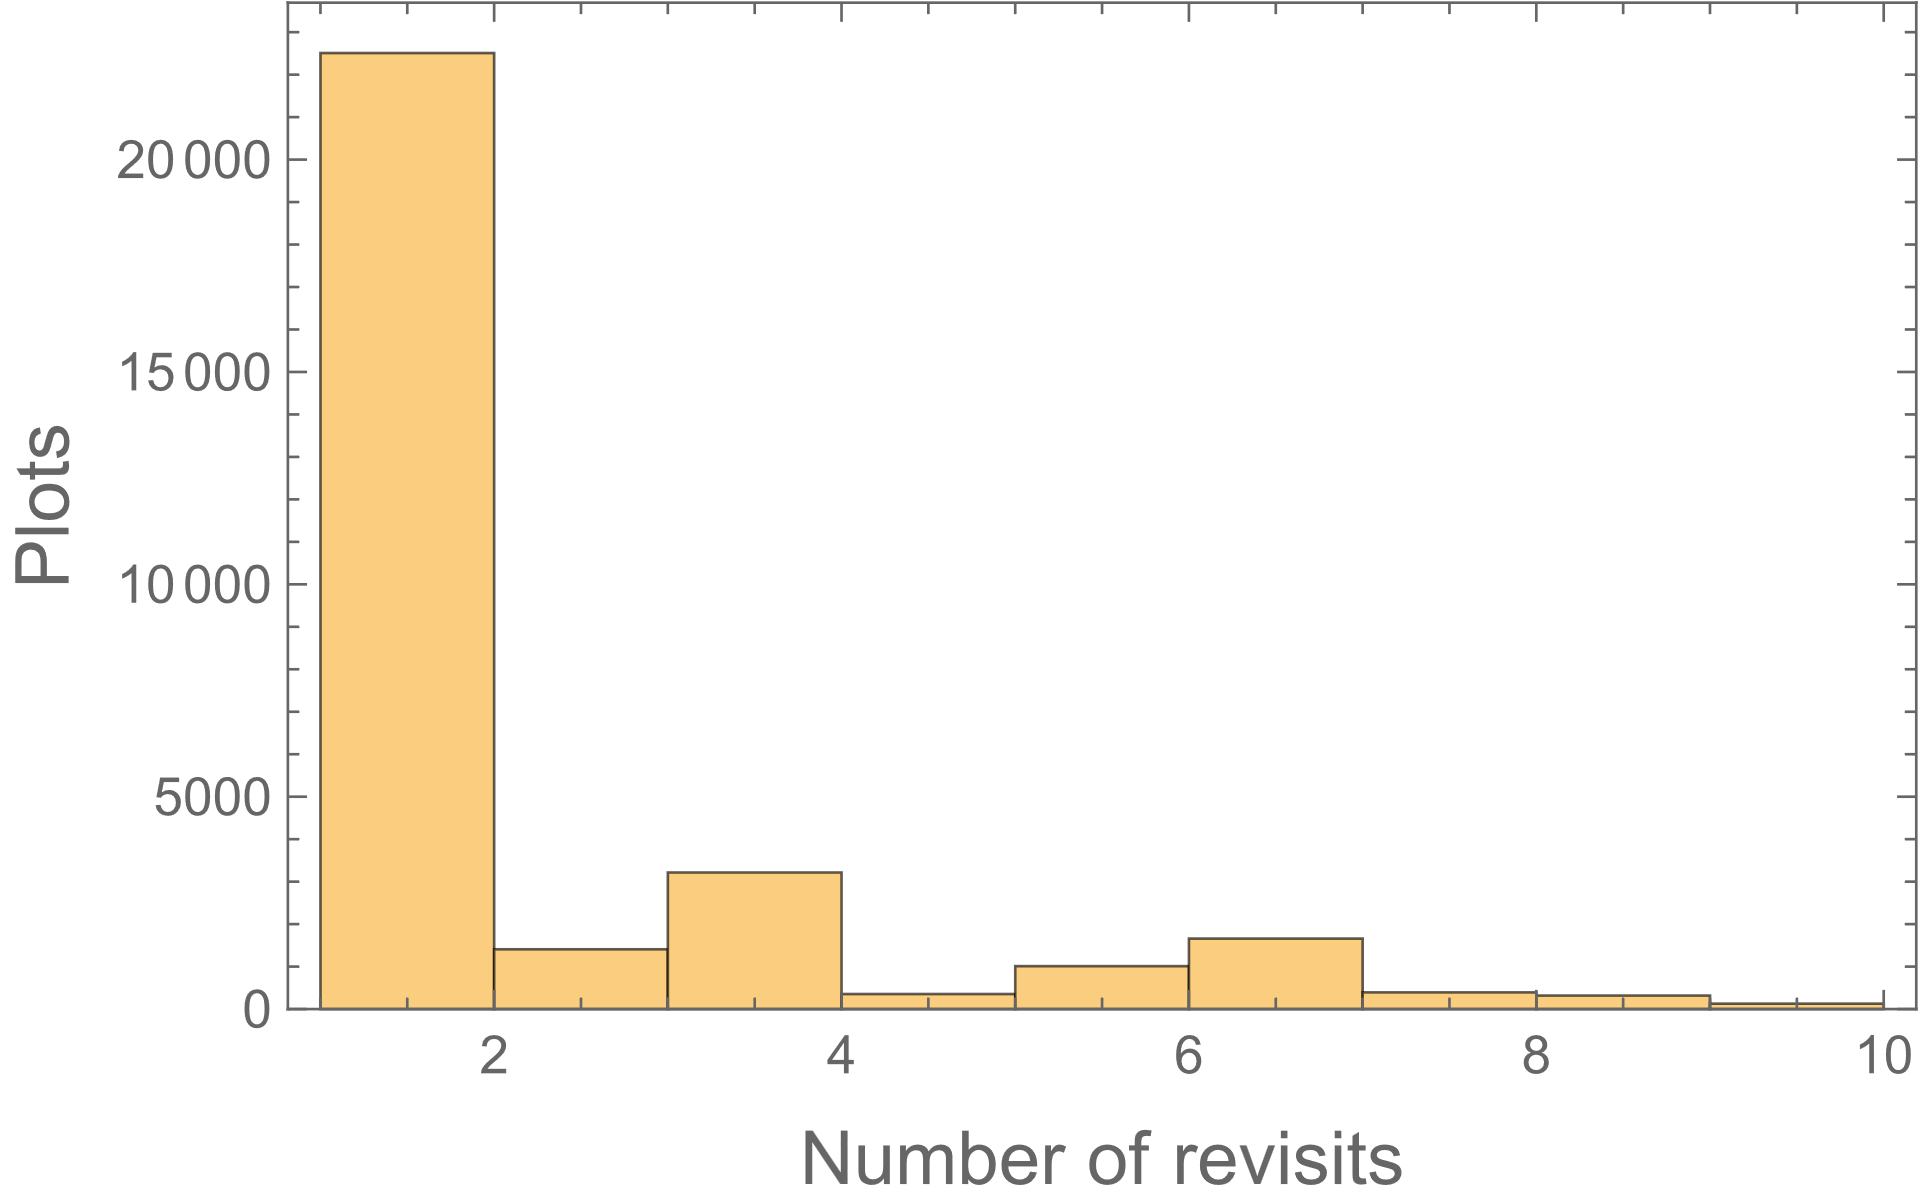


**Figure S2.** Histogram showing the distribution of number of revisits of the vegetation plots used in the study.

**Table S1.** Results of mixed linear models for Ellenberg Indicator Values (see reference in main text) for soil moisture (EIVF), soil fertility (EIVN), soil pH (EIVR) and the EIVN/EIVR ratio with habitat type as a fixed factor and plot as random factor assuming that the residual variation was normally distributed. Var.; Variation, Std. dev.: Standard deviation.

|  | EIVF | | EIVN | | EIVR | | EIVN/R | |
| --- | --- | --- | --- | --- | --- | --- | --- | --- |
|  | Var. | Std. Dev. | Var. | Std. Dev. | Var. | Std. Dev. | Var. | Std. Dev. |
| Intercept | 0.6564 | 0.8102 | 0.8254 | 0.9085 | 0.6588 | 0.8117 | 0.019 | 0.138 |
| Residual | 0.1070 | 0.3271 | 0.1066 | 0.3265 | 0.0885 | 0.2975 | 0.0096 | 0.0981 |

**References**

1. Council of the European Communities. *Council Directive 92/43/EEC of 21 May 1992 on the conservation of natural habitats and of wild fauna and flora*; 1992; pp. 7-50.
